# Supplementary material
Source: publisher site journal article supplement (https://www.dovepress.com/article/615143)
Supplement: Supplementary file 1 [file 615143%20Supplement.docx]

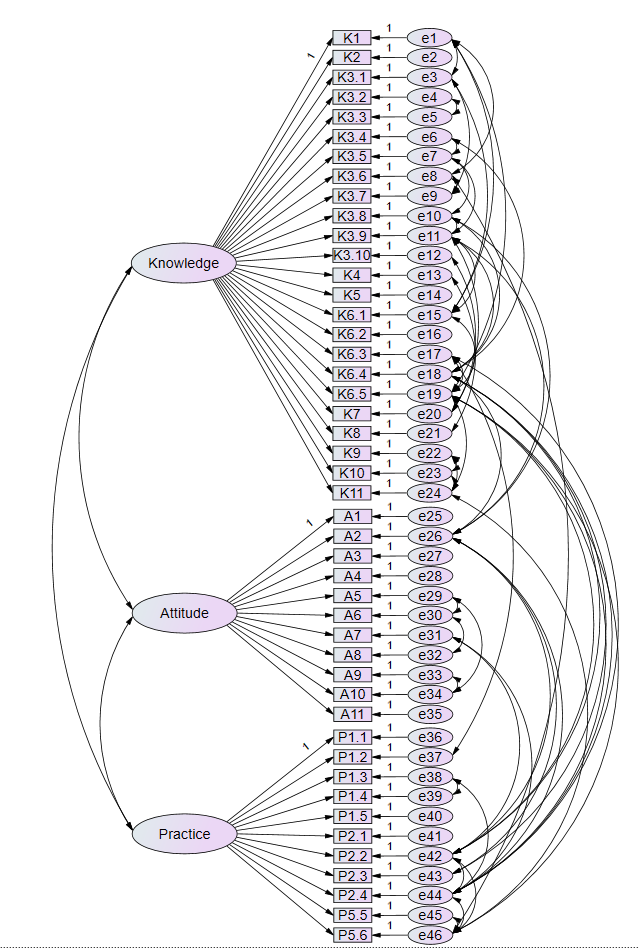


Figure S1. Confirmatory Factor Analysis (CFA) model of the KAP questionnaire

Table S1. Model fit indices and factor loadings for the KAP construct validity analysis

| Indicators | Reference | Actual |
| --- | --- | --- |
| CMIN/DF | 1-3: Excellent, 3-5: Good | 4.345 |
| RMSEA | <0.08: Good | 0.071 |
| IFI | >0.8: Good | 0.895 |
| TLI | >0.8: Good | 0.901 |
| CFI | >0.8: Good | 0.901 |

Table S2. Path factor loadings of CFA model

|  | | | Estimate | Standardized Estimate | S.E. | C.R. | P |
| --- | --- | --- | --- | --- | --- | --- | --- |
| K1 | <--- | Knowledge | 1.000 | 0.427 |  |  |  |
| K2 | <--- | Knowledge | 0.849 | 0.671 | 0.102 | 8.316 | <0.001 |
| K3.1 | <--- | Knowledge | 0.737 | 0.560 | 0.088 | 8.350 | <0.001 |
| K3.2 | <--- | Knowledge | 0.965 | 0.606 | 0.121 | 7.973 | <0.001 |
| K3.3 | <--- | Knowledge | 1.052 | 0.633 | 0.129 | 8.122 | <0.001 |
| K3.4 | <--- | Knowledge | 0.637 | 0.406 | 0.099 | 6.442 | <0.001 |
| K3.5 | <--- | Knowledge | 0.470 | 0.357 | 0.079 | 5.923 | <0.001 |
| K3.6 | <--- | Knowledge | 0.338 | 0.217 | 0.078 | 4.323 | <0.001 |
| K3.7 | <--- | Knowledge | 0.487 | 0.352 | 0.083 | 5.857 | <0.001 |
| K3.8 | <--- | Knowledge | 0.493 | 0.349 | 0.082 | 6.033 | <0.001 |
| K3.9 | <--- | Knowledge | 0.330 | 0.256 | 0.069 | 4.756 | <0.001 |
| K3.10 | <--- | Knowledge | 0.594 | 0.403 | 0.093 | 6.406 | <0.001 |
| K4 | <--- | Knowledge | 0.719 | 0.469 | 0.103 | 7.006 | <0.001 |
| K5 | <--- | Knowledge | 0.934 | 0.633 | 0.115 | 8.129 | <0.001 |
| K6.1 | <--- | Knowledge | 0.416 | 0.305 | 0.061 | 6.790 | <0.001 |
| K6.2 | <--- | Knowledge | 0.857 | 0.591 | 0.109 | 7.890 | <0.001 |
| K6.3 | <--- | Knowledge | 0.883 | 0.593 | 0.111 | 7.950 | <0.001 |
| K6.4 | <--- | Knowledge | 0.479 | 0.344 | 0.079 | 6.035 | <0.001 |
| K6.5 | <--- | Knowledge | 0.498 | 0.356 | 0.070 | 7.152 | <0.001 |
| K7 | <--- | Knowledge | 0.983 | 0.625 | 0.122 | 8.083 | <0.001 |
| K8 | <--- | Knowledge | 1.201 | 0.705 | 0.142 | 8.469 | <0.001 |
| K9 | <--- | Knowledge | 1.123 | 0.751 | 0.130 | 8.646 | <0.001 |
| K10 | <--- | Knowledge | 1.131 | 0.729 | 0.132 | 8.557 | <0.001 |
| K11 | <--- | Knowledge | 1.133 | 0.710 | 0.133 | 8.494 | <0.001 |
| A1 | <--- | Attitude | 1.000 | 0.677 |  |  |  |
| A2 | <--- | Attitude | 0.366 | 0.138 | 0.121 | 3.018 | 0.003 |
| A3 | <--- | Attitude | 1.195 | 0.746 | 0.086 | 13.881 | <0.001 |
| A4 | <--- | Attitude | 1.129 | 0.607 | 0.098 | 11.559 | <0.001 |
| A5 | <--- | Attitude | 1.160 | 0.681 | 0.091 | 12.757 | <0.001 |
| A6 | <--- | Attitude | 1.120 | 0.664 | 0.090 | 12.460 | <0.001 |
| A7 | <--- | Attitude | 1.078 | 0.340 | 0.158 | 6.841 | <0.001 |
| A8 | <--- | Attitude | 1.097 | 0.575 | 0.100 | 10.981 | <0.001 |
| A9 | <--- | Attitude | 1.237 | 0.750 | 0.089 | 13.900 | <0.001 |
| A10 | <--- | Attitude | 1.185 | 0.760 | 0.085 | 14.014 | <0.001 |
| A11 | <--- | Attitude | 1.323 | 0.722 | 0.098 | 13.494 | <0.001 |
| P1.1 | <--- | Practice | 1.000 | 0.724 |  |  |  |
| P1.2 | <--- | Practice | 1.087 | 0.634 | 0.091 | 12.004 | <0.001 |
| P1.3 | <--- | Practice | 0.670 | 0.359 | 0.098 | 6.848 | <0.001 |
| P1.4 | <--- | Practice | 0.931 | 0.413 | 0.118 | 7.884 | <0.001 |
| P1.5 | <--- | Practice | 0.591 | 0.382 | 0.081 | 7.304 | <0.001 |
| P2.1 | <--- | Practice | 0.835 | 0.424 | 0.103 | 8.084 | <0.001 |
| P2.2 | <--- | Practice | 1.156 | 0.376 | 0.153 | 7.555 | <0.001 |
| P2.3 | <--- | Practice | 1.105 | 0.414 | 0.139 | 7.921 | <0.001 |
| P2.4 | <--- | Practice | 0.847 | 0.285 | 0.142 | 5.973 | <0.001 |
| P5.5 | <--- | Practice | 1.066 | 0.541 | 0.105 | 10.196 | <0.001 |
| P5.6 | <--- | Practice | 0.762 | 0.385 | 0.100 | 7.627 | <0.001 |

Table S3. Correlations among latent constructs and error terms in the CFA model

|  | | | Estimate |
| --- | --- | --- | --- |
| Knowledge | <--> | Attitude | 0.537 |
| Knowledge | <--> | Practice | 0.716 |
| Attitude | <--> | Practice | 0.679 |
| e45 | <--> | e46 | 0.240 |
| e44 | <--> | e46 | -0.322 |
| e42 | <--> | e46 | -0.265 |
| e42 | <--> | e44 | 0.737 |
| e38 | <--> | e44 | -0.058 |
| e38 | <--> | e39 | 0.601 |
| e33 | <--> | e34 | 0.587 |
| e31 | <--> | e44 | -0.305 |
| e31 | <--> | e42 | -0.270 |
| e30 | <--> | e32 | 0.176 |
| e29 | <--> | e34 | -0.114 |
| e29 | <--> | e30 | 0.299 |
| e26 | <--> | e44 | 0.237 |
| e26 | <--> | e43 | 0.145 |
| e26 | <--> | e42 | 0.232 |
| e24 | <--> | e46 | -0.229 |
| e22 | <--> | e23 | 0.662 |
| e19 | <--> | e46 | 0.377 |
| e19 | <--> | e44 | -0.398 |
| e19 | <--> | e42 | -0.291 |
| e18 | <--> | e44 | 0.251 |
| e18 | <--> | e43 | 0.105 |
| e18 | <--> | e42 | 0.226 |
| e18 | <--> | e26 | 0.425 |
| e17 | <--> | e44 | -0.140 |
| e17 | <--> | e19 | 0.089 |
| e15 | <--> | e19 | 0.398 |
| e11 | <--> | e26 | 0.330 |
| e11 | <--> | e18 | 0.599 |
| e11 | <--> | e15 | -0.101 |
| e10 | <--> | e26 | 0.389 |
| e10 | <--> | e18 | 0.502 |
| e10 | <--> | e11 | 0.705 |
| e8 | <--> | e9 | 0.537 |
| e7 | <--> | e11 | 0.310 |
| e7 | <--> | e10 | 0.211 |
| e6 | <--> | e18 | -0.135 |
| e6 | <--> | e7 | 0.702 |
| e4 | <--> | e5 | 0.497 |
| e1 | <--> | e8 | 0.163 |
| e23 | <--> | e24 | 0.484 |
| e11 | <--> | e20 | -0.028 |
| e3 | <--> | e15 | 0.242 |
| e3 | <--> | e9 | 0.205 |
| e1 | <--> | e15 | 0.426 |
| e1 | <--> | e3 | 0.159 |
| e22 | <--> | e24 | 0.424 |
| e19 | <--> | e24 | -0.190 |
| e17 | <--> | e37 | 0.284 |
| e12 | <--> | e20 | 0.441 |
| e13 | <--> | e21 | 0.277 |
| e8 | <--> | e46 | 0.210 |
| e1 | <--> | e19 | 0.260 |

Table S4. Baseline Characteristics

| Variables | N (%) | Knowledge, mean ± SD | *P* | Attitude, mean ± SD | *P* | Practice, mean ± SD | *P* |
| --- | --- | --- | --- | --- | --- | --- | --- |
| N=445 |  | 23.69±8.48 |  | 43.71±4.84 |  | 40.32±5.679 |  |
| Gender |  |  | 0.686 |  | 0.175 |  | <0.001 |
| Male | 295 (66.29) | 23.72±8.73 |  | 43.86±5.04 |  | 39.68±6.08 |  |
| Female | 150 (33.71) | 23.63±8 |  | 43.41±4.42 |  | 41.56±4.55 |  |
| Age, years | 37.67±6.68 |  |  |  |  |  |  |
| BMI |  |  | 0.004 |  | 0.002 |  | <0.001 |
| <18.5 | 30 (6.74) | 28.77±12.28 |  | 43.63±5.91 |  | 44±8.15 |  |
| 18.5-23.9 | 207 (46.52) | 23.93±7.69 |  | 43.15±4.45 |  | 41.11±4.92 |  |
| 24.0-27.9 | 153 (34.38) | 22.14±7.99 |  | 44.01±5.18 |  | 38.92±5.64 |  |
| ≥28 | 55 (12.36) | 24.29±9.11 |  | 45.02±4.43 |  | 39.24±5.54 |  |
| Residence |  |  | 0.005 |  | <0.001 |  | 0.002 |
| Rural | 236 (53.03) | 22.5±7.47 |  | 42.66±4.61 |  | 39.58±5.08 |  |
| Urban | 209 (46.97) | 25.03±9.33 |  | 44.9±4.83 |  | 41.15±6.2 |  |
| Time to first onset of disease |  |  | 0.242 |  | 0.006 |  | 0.010 |
| Less than 1 year | 371 (83.37) | 23.49±8.62 |  | 44.09±4.56 |  | 40.69±5.49 |  |
| 1 year or more | 74 (16.63) | 24.69±7.74 |  | 41.81±5.74 |  | 38.46±6.25 |  |
| Education level |  |  | <0.001 |  | 0.003 |  | <0.001 |
| Junior high school or below | 51 (11.46) | 19.65±7.2 |  | 42.65±5.25 |  | 36.71±4.97 |  |
| Senior High School/Vocational School | 106 (23.82) | 20.8±7.22 |  | 42.42±4 |  | 38.48±4.61 |  |
| Junior college | 94 (21.12) | 23.19±8.49 |  | 45.17±4.66 |  | 39.3±5.34 |  |
| Bachelor’s degree or above | 194 (43.60) | 26.57±8.47 |  | 43.99±5.03 |  | 42.76±5.54 |  |
| Occupation |  |  | <0.001 |  | <0.001 |  | <0.001 |
| Leader in Government Agencies, Party Organizations, or Enterprises | 49 (11.01) | 27.27±6.72 |  | 43.02±4.64 |  | 42.8±2.96 |  |
| Professional Technical Personnel | 90 (20.22) | 23.83±5.72 |  | 42.17±3.6 |  | 42.13±3.37 |  |
| General Staff and Related Personnel | 95 (21.35) | 21.31±6.95 |  | 42.88±4.13 |  | 38.2±4.86 |  |
| Business and Service Industry Personnel | 55 (12.36) | 21.42±7.08 |  | 42.71±5.24 |  | 38.51±5.34 |  |
| Agricultural, Forestry, Animal Husbandry, Fishery, and Water Conservancy Production Personnel | 54 (12.13) | 19.63±7.34 |  | 44±4.26 |  | 38.24±4.86 |  |
| Other | 102 (22.92) | 27.43±11.34 |  | 46.57±5.42 |  | 41.57±7.89 |  |
| Monthly household income |  |  | <0.001 |  | <0.001 |  | 0.005 |
| <5000 | 93 (20.9) | 22.04±6.12 |  | 42.19±4.3 |  | 38.59±5.39 |  |
| 5000-10000 | 306 (68.76) | 23.24±8.55 |  | 43.54±4.64 |  | 40.51±5.37 |  |
| >10000 | 46 (10.34) | 29.98±9.47 |  | 47.93±4.94 |  | 42.5±7.24 |  |
| Medical insurance type |  |  | <0.001 |  | <0.001 |  | <0.001 |
| Only Social Medical Insurance | 333 (74.83) | 22.01±7.35 |  | 43.23±4.49 |  | 39.12±5.13 |  |
| Only Commercial Medical Insurance | 34 (7.64) | 23.38±2.74 |  | 40.44±2.85 |  | 41.26±3.31 |  |
| Both Social and Commercial Medical Insurance | 78 (17.53) | 31±10.6 |  | 47.22±5.14 |  | 45±6.24 |  |
| Marital status |  |  | 0.882 |  | 0.004 |  | 0.261 |
| Married | 352 (79.1) | 23.86±8.69 |  | 43.96±4.86 |  | 40.27±5.78 |  |
| Single | 93 (20.90) | 23.03±7.66 |  | 42.78±4.68 |  | 40.49±5.31 |  |
| Hospital of current visit |  |  | 0.305 |  | <0.001 |  | 0.443 |
| County-level (City) Hospital | 143 (32.13) | 22.34±5.54 |  | 41.57±4.25 |  | 40.34±4.26 |  |
| Prefecture-level City Hospital | 95 (21.35) | 24.68±11.03 |  | 43.8±5.84 |  | 41.02±7.81 |  |
| Provincial Tertiary General Hospital | 207 (46.52) | 24.16±8.74 |  | 45.15±4.14 |  | 39.98±5.37 |  |
| Immediate family members with cardiovascular diseases |  |  | 0.037 |  | <0.001 |  | <0.001 |
| Yes | 292 (65.62) | 24.22±8.16 |  | 43.22±4.67 |  | 40.89±5.5 |  |
| No | 153 (34.38) | 22.67±9 |  | 44.65±5.04 |  | 39.22±5.86 |  |
| Smoking status |  |  | 0.017 |  | 0.544 |  | <0.001 |
| Never smoked | 220 (49.44) | 24.87±9.03 |  | 44.02±5.11 |  | 42.08±5.48 |  |
| Former smoker, currently quit | 128 (28.76) | 22.94±8.17 |  | 43.7±4.78 |  | 39.32±4.78 |  |
| Currently smoking | 97 (21.8) | 22±7.19 |  | 43.04±4.24 |  | 37.64±5.89 |  |
| Drinking status |  |  | 0.127 |  | 0.469 |  | <0.001 |
| Never drink alcohol | 169 (37.98) | 24.72±9.29 |  | 43.8±5.11 |  | 41.64±5.89 |  |
| Former drinker, currently abstinent | 133 (29.89) | 22.4±7.78 |  | 43.95±5.23 |  | 39.54±5.31 |  |
| Currently drinking | 143 (32.13) | 23.66±7.98 |  | 43.38±4.09 |  | 39.47±5.5 |  |
| Frequency of staying up late |  |  | 0.008 |  | 0.011 |  | 0.001 |
| Never | 83 (18.65) | 26.39±9.76 |  | 43.04±5.16 |  | 42.48±5.98 |  |
| Occasionally | 203 (45.62) | 22.94±7.05 |  | 43.64±4.85 |  | 39.87±5.33 |  |
| Sometimes | 72 (16.18) | 22.69±9.76 |  | 43.69±4.91 |  | 39±5.61 |  |
| Often/always | 87 (19.55) | 23.68±8.71 |  | 44.54±4.38 |  | 40.39±5.77 |  |
| Underlying diseases (multiple choice) |  |  |  |  |  |  |  |
| Hypertension | 209 (46.97) |  |  |  |  |  |  |
| Diabetes | 100 (22.47) |  |  |  |  |  |  |
| Other cardiovascular or cerebrovascular diseases | 60 (13.48) |  |  |  |  |  |  |
| Other | 35 (7.87) |  |  |  |  |  |  |
| None of the above | 117 (26.29) |  |  |  |  |  |  |

Table S5. Distribution of KAP dimension responses

| Knowledge, n (%) | | | | | Yes | | | No | | | |  | | |
| --- | --- | --- | --- | --- | --- | --- | --- | --- | --- | --- | --- | --- | --- | --- |
| 1. Do you know the cause of your current illness? | | | | | 215 (48.31) | | | 230 (51.69) | | | |  | | |
|  | | | | | Very familiar | | | Heard of it | | | | Not clear | | |
| 2. Stroke, also known as cerebrovascular accident, is divided into two major types: hemorrhagic stroke and ischemic stroke. | | | | | 94 (21.12) | | | 313 (70.34) | | | | 38 (8.54) | | |
| 3. Awareness of stroke risk factors: (The first six are preventable; the last three are not preventable) | | | | |  | | |  | | | |  | | |
| 3.1 Hypertension | | | | | 189 (42.47) | | | 240 (53.93) | | | | 16 (3.6) | | |
| 3.2 Abnormal glucose metabolism and diabetes | | | | | 151 (33.93) | | | 230 (51.69) | | | | 64 (14.38) | | |
| 3.3 Abnormal lipid metabolism | | | | | 126 (28.31) | | | 227 (51.01) | | | | 92 (20.67) | | |
| 3.4 Hyperhomocysteinemia | | | | | 34 (7.64) | | | 149 (33.48) | | | | 262 (58.88) | | |
| 3.5 Obstructive sleep apnea syndrome | | | | | 27 (6.07) | | | 125 (28.09) | | | | 293 (65.84) | | |
| 3.6 smoking | | | | | 166 (37.3) | | | 214 (48.09) | | | | 65 (14.61) | | |
| 3.7 alcohol | | | | | 183 (41.12) | | | 238 (53.48) | | | | 24 (5.39) | | |
| 3.8 age | | | | | 34 (7.64) | | | 160 (35.96) | | | | 251 (56.4) | | |
| 3.9 gender | | | | | 29 (6.52) | | | 129 (28.99) | | | | 287 (64.49) | | |
| 3.10 family history | | | | | 50 (11.24) | | | 259 (58.2) | | | | 136 (30.56) | | |
| 4. The BE FAST principle is a simple method to identify stroke: Balance (loss of balance), Eyes (sudden vision changes), Face (facial drooping), Arm (arm weakness), Speech (slurred speech), Time (time is critical). If you notice these symptoms, you should immediately call emergency services. | | | | | 64 (14.38) | | | 252 (56.63) | | | | 129 (28.99) | | |
| 5. You should manage your health by taking medication on time, having regular check-ups (especially monitoring blood pressure, blood sugar, and lipids), maintaining a healthy diet, exercising regularly, quitting smoking and limiting alcohol, controlling weight, and avoiding overwork. | | | | | 130 (29.21) | | | 262 (58.88) | | | | 53 (11.91) | | |
| 6. Awareness of secondary prevention measures for stroke: | | | | |  | | |  | | | |  | | |
| 6.1 Medication treatment | | | | | 259 (58.2) | | | 167 (37.53) | | | | 19 (4.27) | | |
| 6.2 Lifestyle adjustments (e.g., quitting smoking, abstaining from alcohol, regular exercise, regular daily routine) | | | | | 174 (39.1) | | | 237 (53.26) | | | | 34 (7.64) | | |
| 6.3 Regular monitoring and management of related diseases (e.g., regular blood pressure and blood sugar measurement) | | | | | 154 (34.61) | | | 241 (54.16) | | | | 50 (11.24) | | |
| 6.4 Providing psychological counseling or joining support groups | | | | | 31 (6.97) | | | 146 (32.81) | | | | 268 (60.22) | | |
| 6.5 Regular follow-up visits at the hospital to track disease changes | | | | | 212 (47.64) | | | 194 (43.6) | | | | 39 (8.76) | | |
| 7. If there is a family history of stroke, your risk of stroke may be increased. | | | | | 71 (15.96) | | | 245 (55.06) | | | | 129 (28.99) | | |
| 8. Transient ischemic attack (TIA), as a warning sign of stroke, requires immediate medical attention to prevent progression to full stroke. | | | | | 91 (20.45) | | | 213 (47.87) | | | | 141 (31.69) | | |
| 9. Stroke rehabilitation mainly includes limb function training, speech training, activities of daily living training, cognitive training, and psychological rehabilitation. | | | | | 80 (17.98) | | | 270 (60.67) | | | | 95 (21.35) | | |
| 10. During the acute and early stages of stroke, you should receive professional rehabilitation training at a specialized medical institution; during the chronic recovery phase after discharge, rehabilitation should continue in the community or at home. | | | | | 84 (18.88) | | | 256 (57.53) | | | | 105 (23.6) | | |
| 11. You should engage in appropriate physical activity, but progress gradually and according to your ability. | | | | | 118 (26.52) | | | 242 (54.38) | | | | 85 (19.1) | | |
| Attitude, n (%) | Strongly agree | | Agree | | | Neutral | | | | Disagree | | | Strongly disagree | | |
| 1. I believe stroke is a serious health problem. | 179 (40.22) | | 254 (57.08) | | | 10 (2.25) | | | | 2 (0.45) | | |  | | |
| 2. I used to think stroke only happens to elderly people, and young people do not need to worry too much. | 187 (42.02) | | 201 (45.17) | | | 12 (2.7) | | | | 22 (4.94) | | | 23 (5.17) | | |
| 3. I understand that early recognition of stroke symptoms is very important for treatment. | 177 (39.78) | | 248 (55.73) | | | 15 (3.37) | | | | 5 (1.12) | | |  | | |
| 4. I believe stroke has had a great impact on my life. | 152 (34.16) | | 224 (50.34) | | | 66 (14.83) | | | | 3 (0.67) | | |  | | |
| 5. I believe a healthy lifestyle can effectively reduce the risk of stroke. | 143 (32.13) | | 259 (58.2) | | | 38 (8.54) | | | | 5 (1.12) | | |  | | |
| 6. I believe controlling blood pressure and blood sugar levels is crucial for stroke prevention. | 139 (31.24) | | 266 (59.78) | | | 35 (7.87) | | | | 4 (0.9) | | | 1 (0.22) | | |
| 7. I think quitting smoking and limiting alcohol have little effect on stroke prevention. | 30 (6.74) | | 130 (29.21) | | | 91 (20.45) | | | | 120 (26.97) | | | 74 (16.63) | | |
| 8. I recognize that maintaining an appropriate body weight is important for stroke prevention. | 137 (30.79) | | 242 (54.38) | | | 57 (12.81) | | | | 8 (1.8) | | | 1 (0.22) | | |
| 9. If I or my family members are diagnosed with stroke, I will seek professional medical help immediately. | 218 (48.99) | | 209 (46.97) | | | 12 (2.7) | | | | 6 (1.35) | | |  | | |
| 10. Family support is very important for stroke patient rehabilitation. | 219 (49.21) | | 211 (47.42) | | | 12 (2.7) | | | | 3 (0.67) | | |  | | |
| 11. I believe stroke patients should actively participate in rehabilitation following doctors’ instructions. | 192 (43.15) | | 222 (49.89) | | | 22 (4.94) | | | | 7 (1.57) | | | 2 (0.45) | | |
| Practice, n (%) | |  | |  | | |  | | | |  | | |  | |
| 1. Since being diagnosed with stroke, I have started the following lifestyle changes: | | Always | | Often | | | Sometimes | | | | Rarely | | | Never | |
| 1.1 Consciously eating a lighter diet than before, with more fruits and vegetables | | 96 (21.57) | | 288 (64.72) | | | 52 (11.69) | | | | 9 (2.02) | | |  | |
| 1.2 Regularly monitoring my blood pressure and blood sugar levels | | 129 (28.99) | | 228 (51.24) | | | 69 (15.51) | | | | 16 (3.6) | | | 3 (0.67) | |
| 1.3 Strictly controlling my alcohol intake or never drinking | | 189 (42.47) | | 168 (37.75) | | | 69 (15.51) | | | | 16 (3.6) | | | 3 (0.67) | |
| 1.4 Never smoking or have quit smoking | | 221 (49.66) | | 129 (28.99) | | | 58 (13.03) | | | | 23 (5.17) | | | 14 (3.15) | |
| 1.5 Going to bed early and getting up early, ensuring good sleep quality | | 117 (26.29) | | 266 (59.78) | | | 46 (10.34) | | | | 15 (3.37) | | | 1 (0.22) | |
| 2. Since being diagnosed with stroke, I have started the following physical exercises: | | Always | | Often | | | Sometimes | | | | Rarely | | | Never | |
| 2.1 Walking | | 217 (48.76) | | 172 (38.65) | | | 27 (6.07) | | | | 20 (4.49) | | | 9 (2.02) | |
| 2.2 Jogging | | 72 (16.18) | | 140 (31.46) | | | 43 (9.66) | | | | 75 (16.85) | | | 115 (25.84) | |
| 2.3 Tai Chi | | 35 (7.87) | | 29 (6.52) | | | 28 (6.29) | | | | 126 (28.31) | | | 227 (51.01) | |
| 2.4 Square dancing | | 67 (15.06) | | 123 (27.64) | | | 41 (9.21) | | | | 82 (18.43) | | | 1. 9.66) | |
| 3. If I begin stroke treatment, my acceptance of the following treatment methods is: | | Always | | Often | | | Sometimes | | | | Rarely | | | Never | |
| 3.1 Medication treatment | | 306 (68.76) | | 127 (28.54) | | | 6 (1.35) | | | | 6 (1.35) | | |  | |
| 3.2 Surgical treatment | | 177 (39.78) | | 135 (30.34) | | | 84 (18.88) | | | | 44 (9.89) | | | 5 (1.12) | |
| 3.3 Traditional Chinese medicine treatment | | 274 (61.57) | | 138 (31.01) | | | 24 (5.39) | | | | 6 (1.35) | | | 3 (0.67) | |
|  | | Yes | | No | | |  | | | |  | | |  | |
| 4. Are you currently undergoing stroke rehabilitation treatment? | | 185 (41.57) | | 260 (58.43) | | |  | | | |  | | |  | |
|  | | The disease does not require rehabilitation treatment | | | | | | | Personal conditions do not allow treatment (e.g., economic concerns, distance to hospital, fear of poor treatment outcomes, etc.) | | | | | | |
| 4.1 If no, what is the reason? | | 144 (32.36) | | 116 (26.07) | | |  | | | |  | | |  | |
| 5. Your practice of the following rehabilitation treatments: | | Always | | Often | | | Sometimes | | | | Rarely | | | Never | |
| 5.1 Physical therapy: Strengthening muscles, improving balance and coordination, restoring motor function, and preventing complications such as muscle atrophy and joint stiffness. | | 79 (17.75) | | 62 (13.93) | | | 18 (4.04) | | | | 8 (1.8) | | | 18 (4.04) | |
| 5.2 Occupational therapy: Relearning daily living skills such as dressing, eating, bathing, toileting, and fine motor skills needed for work and leisure activities. | | 78 (17.53) | | 43 (9.66) | | | 23 (5.17) | | | | 34 (7.64) | | | 7 (1.57) | |
| 5.3 Speech and language therapy: For patients with communication disorders or swallowing difficulties, improving speaking, understanding, reading, writing abilities, and safe swallowing through various exercises. | | 42 (9.44) | | 35 (7.87) | | | 24 (5.39) | | | | 52 (11.69) | | | 32 (7.19) | |
| 5.4 Cognitive rehabilitation: Helping patients with affected cognitive functions such as memory, attention, judgment, and problem-solving through specialized training games and strategies to promote brain function recovery and compensation. | | 35 (7.87) | | 25 (5.62) | | | 12 (2.7) | | | | 62 (13.93) | | | 51 (11.46) | |
| 5.5 Nutritional guidance: Providing personalized dietary advice to ensure sufficient nutrition while controlling weight and reducing cardiovascular disease risk. | | 77 (17.3) | | 280 (62.92) | | | 40 (8.99) | | | | 33 (7.42) | | | 15 (3.37) | |
| 5.6 Continuous medical management and monitoring: Including regular doctor follow-ups, monitoring blood pressure, blood sugar, cholesterol, managing chronic diseases, and preventing recurrent stroke. | | 154 (34.61) | | 207 (46.52) | | | 19 (4.27) | | | | 61 (13.71) | | | 4 (0.9) | |
